# Supplementary material for: Proteomic Analysis of Estrogen-Mediated Signal Transduction in Osteoclasts Formation
Source: Biomed Res Int. 2015 May 18;2015:596789. doi: 10.1155/2015/596789 (PMC4450280; doi:10.1155/2015/596789)
Supplement: Supplementary file 1 — Proteomic analysis of estrogen mediated upregulatied and downregulated proteins. Details of proteins were supplied, including accession numbers, description of the proteins, original ratio values and GAPDH adjusted values, scores and coverage. [file 596789.f1.xlsx]

## Sheet: Sheet1
Accession	Description	Score	Coverage	129/128	GAPDH Adjust
Q3U4X8	DNA ligase OS=Mus musculus GN=Lig1 PE=1 SV=1 - [Q3U4X8_MOUSE]	151.97	31.01	2.93559	3.04522	Upregulated Proteins
A2ARQ2	Small EDRK-rich factor 2 OS=Mus musculus GN=Serf2 PE=4 SV=1 - [A2ARQ2_MOUSE]	10.1634	26.19	1.89596	1.96676
D3YVV7	Protein Nova2 OS=Mus musculus GN=Nova2 PE=4 SV=2 - [D3YVV7_MOUSE]	2.55184	1.63	1.83578	1.90434
V9GXA7	Uncharacterized protein OS=Mus musculus GN=Gm15294 PE=3 SV=1 - [V9GXA7_MOUSE]	38.6643	33.88	1.51417	1.57072
Q9D7I8	Protein FAM83D OS=Mus musculus GN=Fam83d PE=2 SV=1 - [FA83D_MOUSE]	2.96745	1.37	1.50553	1.56175
P53996	Cellular nucleic acid-binding protein OS=Mus musculus GN=Cnbp PE=1 SV=2 - [CNBP_MOUSE]	64.9301	43.82	1.46429	1.51897
Q91WA1	TIMELESS-interacting protein OS=Mus musculus GN=Tipin PE=1 SV=2 - [TIPIN_MOUSE]	4.0046	5.76	1.4413	1.49513
Q91V92	ATP-citrate synthase OS=Mus musculus GN=Acly PE=1 SV=1 - [ACLY_MOUSE]	318.777	35.56	1.43448	1.48805
Q9D727	Uncharacterized protein C6orf226 homolog OS=Mus musculus PE=4 SV=1 - [CF226_MOUSE]	5.16451	19.3	1.42414	1.47732
A2A9P2	NAD kinase OS=Mus musculus GN=Nadk PE=3 SV=1 - [A2A9P2_MOUSE]	26.214	15.43	1.42018	1.47322
G3UXZ2	Tumor protein p53-inducible nuclear protein 2 (Fragment) OS=Mus musculus GN=Trp53inp2 PE=4 SV=1 - [G3UXZ2_MOUSE]	3.05422	7.06	1.38605	1.43781
P14148	60S ribosomal protein L7 OS=Mus musculus GN=Rpl7 PE=1 SV=2 - [RL7_MOUSE]	156.217	48.89	1.37619	1.42758
Q5DTT3	Protein FAM208B OS=Mus musculus GN=Fam208b PE=2 SV=2 - [F208B_MOUSE]	2.59229	0.46	1.37173	1.42296
Q99M54	Cell division cycle-associated protein 3 OS=Mus musculus GN=Cdca3 PE=1 SV=2 - [CDCA3_MOUSE]	3.58074	3.76	1.3695	1.42064
H3BJJ1	Geminin (Fragment) OS=Mus musculus GN=Gmnn PE=4 SV=1 - [H3BJJ1_MOUSE]	2.83815	11.38	1.36315	1.41405
Q8K4K6-2	Isoform 2 of Pantothenate kinase 1 OS=Mus musculus GN=Pank1 - [PANK1_MOUSE]	6.55032	6.43	1.36105	1.41187
Q9D975	Sulfiredoxin-1 OS=Mus musculus GN=Srxn1 PE=2 SV=1 - [SRXN1_MOUSE]	3.40278	8.09	1.36033	1.41113
Q8VDU3	Apol9a protein OS=Mus musculus GN=Apol9a PE=2 SV=1 - [Q8VDU3_MOUSE]	9.80511	10	1.3581	1.40881
Q3TUF7-2	Isoform 2 of YEATS domain-containing protein 2 OS=Mus musculus GN=Yeats2 - [YETS2_MOUSE]	2.6035	1	1.35513	1.40573
P00860	Ornithine decarboxylase OS=Mus musculus GN=Odc1 PE=1 SV=2 - [DCOR_MOUSE]	14.8659	13.02	1.35207	1.40256
Q9DBS2	Tumor protein p63-regulated gene 1-like protein OS=Mus musculus GN=Tprg1l PE=1 SV=1 - [TPRGL_MOUSE]	8.64248	14.66	1.3493	1.39968
Q922U2	Keratin, type II cytoskeletal 5 OS=Mus musculus GN=Krt5 PE=1 SV=1 - [K2C5_MOUSE]	29.8956	10	1.3449	1.39513
E9QA93	Arachidonate 5-lipoxygenase OS=Mus musculus GN=Alox5 PE=3 SV=1 - [E9QA93_MOUSE]	5.50401	2.43	1.34071	1.39077
S4R2A9	Protein transport protein Sec31A (Fragment) OS=Mus musculus GN=Sec31a PE=4 SV=1 - [S4R2A9_MOUSE]	203.98	27.3	1.33451	1.38434
O35368	Interferon-activable protein 203 OS=Mus musculus GN=Ifi203 PE=1 SV=1 - [IFI3_MOUSE]	37.3061	19.61	1.32875	1.37837
D3YYI8	Histone deacetylase OS=Mus musculus GN=Gm10093 PE=3 SV=1 - [D3YYI8_MOUSE]	89.2962	30.08	1.32454	1.37401
Q3TQX1	Origin recognition complex subunit 6 OS=Mus musculus GN=Orc6 PE=2 SV=1 - [Q3TQX1_MOUSE]	6.64153	11.83	1.32435	1.37381
G5E8E1	Leucine rich repeat (In FLII) interacting protein 1, isoform CRA_e OS=Mus musculus GN=Lrrfip1 PE=1 SV=1 - [G5E8E1_MOUSE]	57.3475	21.73	1.32084	1.37016
E9PXC2	Upstream stimulatory factor 2 OS=Mus musculus GN=Usf2 PE=4 SV=1 - [E9PXC2_MOUSE]	6.77403	9.77	1.31835	1.36759
A2AUF7	Rab9 effector protein with kelch motifs OS=Mus musculus GN=Rabepk PE=4 SV=1 - [A2AUF7_MOUSE]	3.94107	3.43	1.31516	1.36427
Q3UL36	Arginine and glutamate-rich protein 1 OS=Mus musculus GN=Arglu1 PE=1 SV=2 - [ARGL1_MOUSE]	12.4096	8.86	1.31154	1.36052
Q8CFC7-2	Isoform 2 of CLK4-associating serine/arginine rich protein OS=Mus musculus GN=Clasrp - [CLASR_MOUSE]	6.42979	3.4	1.31104	1.36
J3JS24	Alpha-1,3-mannosyl-glycoprotein 2-beta-N-acetylglucosaminyltransferase (Fragment) OS=Mus musculus GN=Mgat1 PE=4 SV=1 - [J3JS24_MOUSE]	3.54444	7.5	1.30906	1.35795
F6WL90	Nuclear autoantigen Sp-100 (Fragment) OS=Mus musculus GN=Sp100 PE=4 SV=1 - [F6WL90_MOUSE]	13.3083	17.22	1.30503	1.35376
D3YYL1	B-cell CLL/lymphoma 7 protein family member B OS=Mus musculus GN=Bcl7b PE=4 SV=1 - [D3YYL1_MOUSE]	12.2834	26.9	1.30186	1.35048
D3Z6H8	S-adenosylmethionine decarboxylase proenzyme OS=Mus musculus GN=Amd2 PE=1 SV=1 - [D3Z6H8_MOUSE]	2.96062	2.4	1.30162	1.35023
P97762	Retinitis pigmentosa 9 protein homolog OS=Mus musculus GN=rp9 PE=1 SV=1 - [RP9_MOUSE]	7.12776	4.69	1.30027	1.34883
G3UZ60	Small ubiquitin-related modifier 3 OS=Mus musculus GN=Sumo3 PE=4 SV=1 - [G3UZ60_MOUSE]	12.9407	28	1.29891	1.34741
Q8CI03	FLYWCH-type zinc finger-containing protein 1 OS=Mus musculus GN=Flywch1 PE=2 SV=2 - [FWCH1_MOUSE]	3.34129	1.78	1.29411	1.34243
Q8CFN5-4	Isoform 4 of Myocyte-specific enhancer factor 2C OS=Mus musculus GN=Mef2c - [MEF2C_MOUSE]	16.3131	10.65	1.29272	1.341
F6XI62	60S ribosomal protein L7 (Fragment) OS=Mus musculus GN=Rpl7 PE=1 SV=1 - [F6XI62_MOUSE]	127.804	40.5	1.29145	1.33968
Q3V4D5	N-acetyltransferase ARD1 homolog (S. cerevisiae), isoform CRA_b OS=Mus musculus GN=Naa10 PE=2 SV=1 - [Q3V4D5_MOUSE]	40.941	30.67	1.28775	1.33584
G3UZR1	Tubulin beta-5 chain (Fragment) OS=Mus musculus GN=Tubb5 PE=4 SV=2 - [G3UZR1_MOUSE]	158.343	92.42	1.28247	1.33036
Q8R344	Coiled-coil domain-containing protein 12 OS=Mus musculus GN=Ccdc12 PE=1 SV=2 - [CCD12_MOUSE]	7.35203	7.83	1.27782	1.32554
Q8K4T5	Dual specificity protein phosphatase 19 OS=Mus musculus GN=Dusp19 PE=2 SV=1 - [DUS19_MOUSE]	2.75313	6.36	1.27771	1.32543
A2AC16	Dicarbonyl L-xylulose reductase, isoform CRA_a OS=Mus musculus GN=Dcxr PE=4 SV=1 - [A2AC16_MOUSE]	2.84061	3.39	1.27751	1.32522
Q6NXH3-3	Isoform 3 of Vasculin OS=Mus musculus GN=Gpbp1 - [GPBP1_MOUSE]	3.85452	2.72	1.2694	1.3168
A6H5X4-2	Isoform 2 of PHD finger protein 11 OS=Mus musculus GN=Phf11 - [PHF11_MOUSE]	16.639	17.1	1.26706	1.31438
P61979	Heterogeneous nuclear ribonucleoprotein K OS=Mus musculus GN=Hnrnpk PE=1 SV=1 - [HNRPK_MOUSE]	296.026	61.99	1.2658	1.31307
F6R9A8	Protein Zfp958 OS=Mus musculus GN=Zfp958 PE=4 SV=1 - [F6R9A8_MOUSE]	15.868	5.36	1.26571	1.31298
G5E8H3	DNA-binding protein Ikaros OS=Mus musculus GN=Ikzf1 PE=4 SV=1 - [G5E8H3_MOUSE]	15.1273	9.51	1.26043	1.3075
Q9JHC9-3	Isoform 2 of ETS-related transcription factor Elf-2 OS=Mus musculus GN=Elf2 - [ELF2_MOUSE]	8.4276	4.8	1.25967	1.30671
Q62431	AT-rich interactive domain-containing protein 3A OS=Mus musculus GN=Arid3a PE=1 SV=1 - [ARI3A_MOUSE]	4.42995	2.5	1.25964	1.30668
Q8CGP6	Histone H2A type 1-H OS=Mus musculus GN=Hist1h2ah PE=1 SV=3 - [H2A1H_MOUSE]	548.629	29.69	1.25908	1.3061
D3Z0Q4	Methenyltetrahydrofolate synthase domain-containing protein OS=Mus musculus GN=Mthfsd PE=4 SV=1 - [D3Z0Q4_MOUSE]	5.08274	6.33	1.25786	1.30483
Q9Z179	SHC SH2 domain-binding protein 1 OS=Mus musculus GN=Shcbp1 PE=1 SV=1 - [SHCBP_MOUSE]	14.158	9.73	1.25653	1.30345
F6SXM5	Lupus La protein homolog (Fragment) OS=Mus musculus GN=Ssb PE=1 SV=1 - [F6SXM5_MOUSE]	52.5793	19.13	1.25446	1.30131
Q91WN1	DnaJ homolog subfamily C member 9 OS=Mus musculus GN=Dnajc9 PE=2 SV=2 - [DNJC9_MOUSE]	32.8599	17.76	1.25439	1.30123
G3UZS1	Homeobox protein Hox-A7 (Fragment) OS=Mus musculus GN=Hoxa7 PE=3 SV=1 - [G3UZS1_MOUSE]	3.39931	8.25	1.25012	1.2968
Q9DAX9	Amyloid protein-binding protein 2 OS=Mus musculus GN=Appbp2 PE=2 SV=1 - [APBP2_MOUSE]	6.04531	2.74	1.24925	1.2959
Q8CIB9	N-acetyltransferase ESCO2 OS=Mus musculus GN=Esco2 PE=2 SV=3 - [ESCO2_MOUSE]	5.95907	1.69	1.24915	1.29579
Q6IQX8	Protein Zfp219 OS=Mus musculus GN=Zfp219 PE=2 SV=1 - [Q6IQX8_MOUSE]	5.20426	2.2	1.24675	1.29331
Q9D7Y9-2	Isoform 2 of Protein SLX4IP OS=Mus musculus GN=Slx4ip - [SLX4I_MOUSE]	5.56168	9.04	1.2463	1.29284
O35744	Chitinase-like protein 3 OS=Mus musculus GN=Chil3 PE=1 SV=2 - [CHIL3_MOUSE]	2.67885	4.77	1.24467	1.29115
Q9D3D9	ATP synthase subunit delta, mitochondrial OS=Mus musculus GN=Atp5d PE=1 SV=1 - [ATPD_MOUSE]	9.99343	5.36	1.24448	1.29096
Q08024-4	Isoform 4 of Core-binding factor subunit beta OS=Mus musculus GN=Cbfb - [PEBB_MOUSE]	41.4338	54.05	1.24375	1.2902
Q6PHZ5	Putative RNA-binding protein 15B OS=Mus musculus GN=Rbm15b PE=1 SV=2 - [RB15B_MOUSE]	2.69631	1.01	1.24267	1.28907
Q9DCH6	AN1-type zinc finger protein 6 OS=Mus musculus GN=Zfand6 PE=1 SV=1 - [ZFAN6_MOUSE]	7.55195	9.87	1.24243	1.28883
E9Q0F0	Protein Krt78 OS=Mus musculus GN=Krt78 PE=4 SV=1 - [E9Q0F0_MOUSE]	10.0909	1.97	1.24142	1.28778
Q9JIQ3	Diablo homolog, mitochondrial OS=Mus musculus GN=Diablo PE=1 SV=2 - [DBLOH_MOUSE]	8.48371	8.44	1.23837	1.28461
Q9CY58-2	Isoform 2 of Plasminogen activator inhibitor 1 RNA-binding protein OS=Mus musculus GN=Serbp1 - [PAIRB_MOUSE]	238.593	59.69	1.23812	1.28435
Q75NR7	ATP-dependent DNA helicase Q4 OS=Mus musculus GN=Recql4 PE=2 SV=2 - [RECQ4_MOUSE]	6.75203	2.06	1.23807	1.28431
A2AMZ4	Uncharacterized protein C17orf89 homolog OS=Mus musculus PE=4 SV=1 - [CQ089_MOUSE]	3.31236	14.86	1.23779	1.28402
P63166	Small ubiquitin-related modifier 1 OS=Mus musculus GN=Sumo1 PE=1 SV=1 - [SUMO1_MOUSE]	8.90159	26.73	1.23586	1.28201
Q9CPV5	Polyamine-modulated factor 1 OS=Mus musculus GN=Pmf1 PE=1 SV=1 - [PMF1_MOUSE]	9.69798	18.32	1.2356	1.28175
Q8BJ90	Zinc finger protein 771 OS=Mus musculus GN=Znf771 PE=2 SV=1 - [ZN771_MOUSE]	8.71483	4.73	1.2349	1.28101
Q8BWC5	Protein EFR3 homolog A OS=Mus musculus GN=Efr3a PE=2 SV=1 - [Q8BWC5_MOUSE]	2.79454	7.47	1.23482	1.28093
P04104	Keratin, type II cytoskeletal 1 OS=Mus musculus GN=Krt1 PE=1 SV=4 - [K2C1_MOUSE]	31.4327	7.22	1.23449	1.28059
Q8K1L5	Protein phosphatase 1 regulatory subunit 11 OS=Mus musculus GN=Ppp1r11 PE=2 SV=1 - [PP1RB_MOUSE]	8.47734	28.24	1.23408	1.28017
G3UW83	Nuclear factor of kappa light polypeptide gene enhancer in B-cells inhibitor-like 2 OS=Mus musculus GN=Tonsl PE=4 SV=1 - [G3UW83_MOUSE]	6.7162	2.35	1.23403	1.28011
M0QW65	Asparagine synthetase domain-containing protein 1 OS=Mus musculus GN=Asnsd1 PE=4 SV=1 - [M0QW65_MOUSE]	4.29499	45.24	1.23378	1.27986
G3X9T2	Protein Zfp619 OS=Mus musculus GN=Zfp619 PE=4 SV=1 - [G3X9T2_MOUSE]	7.01536	2.58	1.23301	1.27905
P63087-2	Isoform Gamma-2 of Serine/threonine-protein phosphatase PP1-gamma catalytic subunit OS=Mus musculus GN=Ppp1cc - [PP1G_MOUSE]	156.083	52.23	1.23262	1.27865
Q5SWW4	Mediator of RNA polymerase II transcription subunit 13 OS=Mus musculus GN=Med13 PE=2 SV=1 - [MED13_MOUSE]	8.37774	1.61	1.2318	1.2778
Q9D0M2	Cell division cycle-associated protein 7 OS=Mus musculus GN=Cdca7 PE=1 SV=1 - [CDCA7_MOUSE]	2.94409	2.36	1.22989	1.27582
A6PWY4-2	Isoform 2 of WD repeat-containing protein 76 OS=Mus musculus GN=Wdr76 - [WDR76_MOUSE]	10.4401	5.92	1.22985	1.27578
E9Q4T0	Holliday junction recognition protein OS=Mus musculus GN=Hjurp PE=4 SV=1 - [E9Q4T0_MOUSE]	3.14142	2.2	1.2285	1.27438
F8VPK6	Xylosyltransferase 1 OS=Mus musculus GN=Xylt1 PE=4 SV=1 - [F8VPK6_MOUSE]	2.59823	1.78	1.22746	1.2733
D3YXD4	IQ domain-containing protein E (Fragment) OS=Mus musculus GN=Iqce PE=4 SV=1 - [D3YXD4_MOUSE]	2.71238	4.32	1.22615	1.27194
Q0VDN7	RUN domain-containing protein 1 OS=Mus musculus GN=Rundc1 PE=2 SV=1 - [RUND1_MOUSE]	3.19551	1.3	1.22608	1.27186
S4R1E5	Glutathione peroxidase OS=Mus musculus GN=Gpx4 PE=3 SV=1 - [S4R1E5_MOUSE]	12.0158	22.93	1.22525	1.271
P09926	Surfeit locus protein 2 OS=Mus musculus GN=Surf2 PE=2 SV=1 - [SURF2_MOUSE]	3.5086	5.45	1.22328	1.26897
Q78JE5	F-box only protein 22 OS=Mus musculus GN=Fbxo22 PE=2 SV=2 - [FBX22_MOUSE]	13.5326	10.45	1.22294	1.26861
Q9QYM8	Centromere protein H OS=Mus musculus GN=Cenph PE=1 SV=1 - [CENPH_MOUSE]	7.68579	12.45	1.22269	1.26835
Q497H0-2	Isoform 2 of AN1-type zinc finger protein 3 OS=Mus musculus GN=Zfand3 - [ZFAN3_MOUSE]	2.60326	3.41	1.22169	1.26732
Q9CQ36	DNA polymerase epsilon subunit 4 OS=Mus musculus GN=Pole4 PE=3 SV=1 - [DPOE4_MOUSE]	8.86556	24.58	1.22145	1.26707
Q8BJS8-3	Isoform 3 of Mdm2-binding protein OS=Mus musculus GN=Mtbp - [MTBP_MOUSE]	4.42678	3.07	1.22073	1.26631
F6YAM1	Protein Zfp930 OS=Mus musculus GN=Zfp930 PE=4 SV=1 - [F6YAM1_MOUSE]	29.1469	27.27	1.21935	1.26489
D3Z644	LisH domain-containing protein FOPNL OS=Mus musculus GN=Fopnl PE=4 SV=1 - [D3Z644_MOUSE]	2.85932	5.04	1.21932	1.26485
Q8R2U4	N-terminal Xaa-Pro-Lys N-methyltransferase 1 OS=Mus musculus GN=Ntmt1 PE=2 SV=3 - [NTM1A_MOUSE]	7.44933	11.66	1.21908	1.26461
Q9Z1B5	Mitotic spindle assembly checkpoint protein MAD2A OS=Mus musculus GN=Mad2l1 PE=1 SV=2 - [MD2L1_MOUSE]	28.3872	36.1	1.21908	1.2646
Q6P9L6	Kinesin-like protein KIF15 OS=Mus musculus GN=Kif15 PE=1 SV=1 - [KIF15_MOUSE]	77.8991	15.21	1.21851	1.26402
D3Z4H6	Nucleolysin TIA-1 OS=Mus musculus GN=Tia1 PE=4 SV=1 - [D3Z4H6_MOUSE]	18.3896	14.03	1.21817	1.26366
Q3U0X6	Protein Zfp217 OS=Mus musculus GN=Zfp217 PE=2 SV=1 - [Q3U0X6_MOUSE]	17.8827	6.15	1.21734	1.2628
Q3UD01	Putative ataxin-7-like protein 3B OS=Mus musculus GN=Atxn7l3b PE=3 SV=1 - [A7L3B_MOUSE]	4.37142	20.62	1.21698	1.26243
Q9QY24-2	Isoform 2 of Z-DNA-binding protein 1 OS=Mus musculus GN=Zbp1 - [ZBP1_MOUSE]	6.1666	11.76	1.21656	1.26199
Q91VT1-2	Isoform 2 of E3 SUMO-protein ligase NSE2 OS=Mus musculus GN=Nsmce2 - [NSE2_MOUSE]	3.52003	5.04	1.21653	1.26196
Q8R4Z4	ETS translocation variant 3 OS=Mus musculus GN=Etv3 PE=2 SV=2 - [ETV3_MOUSE]	10.8539	6.24	1.21534	1.26073
Q03958	Prefoldin subunit 6 OS=Mus musculus GN=Pfdn6 PE=2 SV=1 - [PFD6_MOUSE]	37.9963	49.61	1.2136	1.25892
G3UX50	Death domain-associated protein 6 OS=Mus musculus GN=Daxx PE=4 SV=1 - [G3UX50_MOUSE]	11.3961	6.55	1.21358	1.2589
Q9CQB2	Protein FAM195A OS=Mus musculus GN=Fam195a PE=1 SV=1 - [F195A_MOUSE]	3.82338	6.88	1.21357	1.25889
F6VT90	Ribosome biogenesis methyltransferase WBSCR22 (Fragment) OS=Mus musculus GN=Wbscr22 PE=4 SV=1 - [F6VT90_MOUSE]	14.3791	23.02	1.21308	1.25838
Q80T85	DDB1- and CUL4-associated factor 5 OS=Mus musculus GN=Dcaf5 PE=2 SV=2 - [DCAF5_MOUSE]	8.09811	2.54	1.21292	1.25821
D3Z7B5	Protein C330027C09Rik OS=Mus musculus GN=C330027C09Rik PE=4 SV=1 - [D3Z7B5_MOUSE]	24.0195	6.84	1.21256	1.25784
Q99LZ3	DNA replication complex GINS protein SLD5 OS=Mus musculus GN=Gins4 PE=1 SV=1 - [SLD5_MOUSE]	26.0523	21.08	1.21248	1.25775
Q8K298	Actin-binding protein anillin OS=Mus musculus GN=Anln PE=1 SV=2 - [ANLN_MOUSE]	59.2172	16.15	1.2119	1.25716
P0CL69	Zinc finger protein 703 OS=Mus musculus GN=Znf703 PE=1 SV=1 - [ZN703_MOUSE]	3.45384	1.68	1.21125	1.25648
Q9D0N7	Chromatin assembly factor 1 subunit B OS=Mus musculus GN=Chaf1b PE=2 SV=1 - [CAF1B_MOUSE]	22.4241	9.62	1.21122	1.25646
Q3SXA6	Protein Tnip3 OS=Mus musculus GN=Tnip3 PE=2 SV=1 - [Q3SXA6_MOUSE]	26.6704	30.29	1.21026	1.25546
Q3UMU9-4	Isoform 4 of Hepatoma-derived growth factor-related protein 2 OS=Mus musculus GN=Hdgfrp2 - [HDGR2_MOUSE]	13.8157	6.34	1.20972	1.2549
E9QL31	Disabled homolog 2 OS=Mus musculus GN=Dab2 PE=1 SV=1 - [E9QL31_MOUSE]	123.37	31.28	1.20959	1.25476
Q6PB51	Coiled-coil domain-containing protein 117 OS=Mus musculus GN=Ccdc117 PE=2 SV=1 - [CC117_MOUSE]	3.60105	5.78	1.20695	1.25202
O35047	Homologous-pairing protein 2 homolog OS=Mus musculus GN=Psmc3ip PE=1 SV=1 - [HOP2_MOUSE]	15.4576	26.73	1.20641	1.25146
Q80WR5	UPF0688 protein C1orf174 homolog OS=Mus musculus PE=1 SV=1 - [CA174_MOUSE]	16.9904	23.48	1.20598	1.25102
P61021	Ras-related protein Rab-5B OS=Mus musculus GN=Rab5b PE=1 SV=1 - [RAB5B_MOUSE]	47.7878	25.12	0.771055	0.799849	Downregulated Proteins
A2A8U2-2	Isoform Samp1 of Transmembrane protein 201 OS=Mus musculus GN=Tmem201 - [TM201_MOUSE]	6.40909	5.61	0.770401	0.799171
Q9D6U8	Protein FAM162A OS=Mus musculus GN=Fam162a PE=2 SV=1 - [F162A_MOUSE]	15.6412	19.35	0.770096	0.798855
Q9EPK2-3	Isoform 3 of Protein XRP2 OS=Mus musculus GN=Rp2 - [XRP2_MOUSE]	10.0035	8.07	0.769672	0.798415
Q9EPE9	Manganese-transporting ATPase 13A1 OS=Mus musculus GN=Atp13a1 PE=2 SV=2 - [AT131_MOUSE]	24.656	8.08	0.769516	0.798253
Q62425	NADH dehydrogenase [ubiquinone] 1 alpha subcomplex subunit 4 OS=Mus musculus GN=Ndufa4 PE=1 SV=2 - [NDUA4_MOUSE]	14.1074	24.39	0.76926	0.797988
Q4PJX1	Protein odr-4 homolog OS=Mus musculus GN=Odr4 PE=2 SV=2 - [ODR4_MOUSE]	10.4161	8.72	0.769239	0.797965
Q80ZJ1	Ras-related protein Rap-2a OS=Mus musculus GN=Rap2a PE=1 SV=2 - [RAP2A_MOUSE]	13.2894	20.77	0.769191	0.797916
Q8BVP5	Casein kinase I isoform gamma-2 OS=Mus musculus GN=Csnk1g2 PE=1 SV=1 - [KC1G2_MOUSE]	7.93072	4.82	0.769091	0.797812
P03975	IgE-binding protein OS=Mus musculus GN=Iap PE=2 SV=1 - [IGEB_MOUSE]	27.8048	19.03	0.769087	0.797809
Q5XKN4	Protein jagunal homolog 1 OS=Mus musculus GN=Jagn1 PE=2 SV=2 - [JAGN1_MOUSE]	14.2023	13.66	0.768366	0.79706
B1AU25	Apoptosis-inducing factor 1, mitochondrial OS=Mus musculus GN=Aifm1 PE=1 SV=1 - [B1AU25_MOUSE]	157.349	36.18	0.768214	0.796902
P04441-2	Isoform Short of H-2 class II histocompatibility antigen gamma chain OS=Mus musculus GN=Cd74 - [HG2A_MOUSE]	6.3843	11.16	0.767342	0.795998
Q9DBW0	Cytochrome P450 4V2 OS=Mus musculus GN=Cyp4v2 PE=1 SV=1 - [CP4V2_MOUSE]	6.0778	4.38	0.767232	0.795884
O35435	Dihydroorotate dehydrogenase (quinone), mitochondrial OS=Mus musculus GN=Dhodh PE=2 SV=2 - [PYRD_MOUSE]	3.95124	2.03	0.766318	0.794936
P26954	Interleukin-3 receptor class 2 subunit beta OS=Mus musculus GN=Csf2rb2 PE=2 SV=1 - [IL3B2_MOUSE]	3.19417	1.25	0.766287	0.794904
Q8BH79-2	Isoform 2 of Anoctamin-10 OS=Mus musculus GN=Ano10 - [ANO10_MOUSE]	14.9941	7.49	0.765937	0.79454
Q920A7	AFG3-like protein 1 OS=Mus musculus GN=Afg3l1 PE=2 SV=2 - [AFG31_MOUSE]	21.1145	9.63	0.765644	0.794236
E9Q6R3	Vesicle-trafficking protein SEC22b OS=Mus musculus GN=Sec22b PE=1 SV=1 - [E9Q6R3_MOUSE]	39.0031	50.6	0.765618	0.794209
Q91VE0	Long-chain fatty acid transport protein 4 OS=Mus musculus GN=Slc27a4 PE=1 SV=1 - [S27A4_MOUSE]	2.86342	2.8	0.765553	0.794142
P20934	Protein EVI2A OS=Mus musculus GN=Evi2a PE=1 SV=2 - [EVI2A_MOUSE]	6.20747	8.52	0.765451	0.794036
Q9D5T0	ATPase family AAA domain-containing protein 1 OS=Mus musculus GN=Atad1 PE=1 SV=1 - [ATAD1_MOUSE]	16.5987	12.74	0.764935	0.793501
G3UX26	Voltage-dependent anion-selective channel protein 2 (Fragment) OS=Mus musculus GN=Vdac2 PE=1 SV=1 - [G3UX26_MOUSE]	98.3743	49.12	0.763714	0.792234
P70227	Inositol 1,4,5-trisphosphate receptor type 3 OS=Mus musculus GN=Itpr3 PE=1 SV=3 - [ITPR3_MOUSE]	22.158	2.43	0.763404	0.791912
Q64281-2	Isoform 2 of Leukocyte immunoglobulin-like receptor subfamily B member 4 OS=Mus musculus GN=Lilrb4 - [LIRB4_MOUSE]	15.3676	11.82	0.763056	0.791552
Q8BHL7	CDC42 small effector protein 1 OS=Mus musculus GN=Cdc42se1 PE=3 SV=1 - [C42S1_MOUSE]	3.47367	15	0.762952	0.791444
Q8R1I1	Cytochrome b-c1 complex subunit 9 OS=Mus musculus GN=Uqcr10 PE=1 SV=1 - [QCR9_MOUSE]	5.65963	26.56	0.762935	0.791427
P10833	Ras-related protein R-Ras OS=Mus musculus GN=Rras PE=2 SV=1 - [RRAS_MOUSE]	13.9668	14.22	0.762871	0.79136
Q9D1G1	Ras-related protein Rab-1B OS=Mus musculus GN=Rab1b PE=1 SV=1 - [RAB1B_MOUSE]	192.63	68.66	0.762444	0.790917
Q3UN04	Ubiquitin carboxyl-terminal hydrolase 30 OS=Mus musculus GN=Usp30 PE=2 SV=1 - [UBP30_MOUSE]	3.10371	1.55	0.761952	0.790407
P21279	Guanine nucleotide-binding protein G(q) subunit alpha OS=Mus musculus GN=Gnaq PE=1 SV=4 - [GNAQ_MOUSE]	22.9685	16.99	0.761874	0.790326
O55100-2	Isoform 1B of Synaptogyrin-1 OS=Mus musculus GN=Syngr1 - [SNG1_MOUSE]	6.09572	12.57	0.76126	0.789689
P47740	Fatty aldehyde dehydrogenase OS=Mus musculus GN=Aldh3a2 PE=2 SV=2 - [AL3A2_MOUSE]	35.9578	12.81	0.760411	0.788808
Q9D7J4	Cytochrome c oxidase protein 20 homolog OS=Mus musculus GN=Cox20 PE=2 SV=1 - [COX20_MOUSE]	3.77839	11.97	0.760174	0.788562
P0DJF2	Protein PET117 homolog, mitochondrial OS=Mus musculus GN=Pet117 PE=3 SV=1 - [PT117_MOUSE]	4.4629	12.5	0.75992	0.788299
Q9R1J0	Sterol-4-alpha-carboxylate 3-dehydrogenase, decarboxylating OS=Mus musculus GN=Nsdhl PE=2 SV=1 - [NSDHL_MOUSE]	24.2407	22.93	0.759359	0.787717
Q6DFX2	Anthrax toxin receptor 2 OS=Mus musculus GN=Antxr2 PE=2 SV=1 - [ANTR2_MOUSE]	22.4091	15.61	0.758435	0.786759
A2A9I0	Golgi SNAP receptor complex member 2 OS=Mus musculus GN=Gosr2 PE=4 SV=1 - [A2A9I0_MOUSE]	6.99884	7.27	0.757581	0.785873
Q8BU31	Ras-related protein Rap-2c OS=Mus musculus GN=Rap2c PE=1 SV=1 - [RAP2C_MOUSE]	21.5689	35.52	0.757448	0.785735
Q8CEE7	Retinol dehydrogenase 13 OS=Mus musculus GN=Rdh13 PE=2 SV=1 - [RDH13_MOUSE]	20.2681	15.27	0.757289	0.78557
O70404	Vesicle-associated membrane protein 8 OS=Mus musculus GN=Vamp8 PE=1 SV=1 - [VAMP8_MOUSE]	10.3218	28.71	0.757147	0.785422
Q3U9G9	Lamin-B receptor OS=Mus musculus GN=Lbr PE=1 SV=2 - [LBR_MOUSE]	15.8221	7.19	0.756975	0.785244
P35293	Ras-related protein Rab-18 OS=Mus musculus GN=Rab18 PE=2 SV=2 - [RAB18_MOUSE]	31.6607	38.35	0.754878	0.783068
Q8C163	Nuclease EXOG, mitochondrial OS=Mus musculus GN=Exog PE=2 SV=1 - [EXOG_MOUSE]	5.81995	4.08	0.754546	0.782724
Q6P6I8	Signal-regulatory protein alpha OS=Mus musculus GN=Sirpa PE=1 SV=1 - [Q6P6I8_MOUSE]	38.669	19.06	0.754143	0.782306
Q9CQW2	ADP-ribosylation factor-like protein 8B OS=Mus musculus GN=Arl8b PE=2 SV=1 - [ARL8B_MOUSE]	113.367	53.76	0.754139	0.782302
Q8C407	Protein YIPF4 OS=Mus musculus GN=Yipf4 PE=2 SV=1 - [YIPF4_MOUSE]	10.8101	8.13	0.753576	0.781718
Q8BXZ1	Protein disulfide-isomerase TMX3 OS=Mus musculus GN=Tmx3 PE=1 SV=2 - [TMX3_MOUSE]	20.7173	6.58	0.753128	0.781253
Q60932-2	Isoform Mt-VDAC1 of Voltage-dependent anion-selective channel protein 1 OS=Mus musculus GN=Vdac1 - [VDAC1_MOUSE]	136.781	60.78	0.753117	0.781242
Q8BXN9	Transmembrane protein 87A OS=Mus musculus GN=Tmem87a PE=1 SV=1 - [TM87A_MOUSE]	19.0905	5.95	0.751966	0.780048
E0CY07	Protein kish OS=Mus musculus GN=Tmem167 PE=3 SV=1 - [E0CY07_MOUSE]	3.33439	16.07	0.750971	0.779016
A1L314	Macrophage-expressed gene 1 protein OS=Mus musculus GN=Mpeg1 PE=2 SV=1 - [MPEG1_MOUSE]	11.5306	2.81	0.750278	0.778296
E9Q6M6	Mitochondrial glutamate carrier 1 OS=Mus musculus GN=Slc25a22 PE=3 SV=1 - [E9Q6M6_MOUSE]	10.6627	12.23	0.749731	0.77773
P51150	Ras-related protein Rab-7a OS=Mus musculus GN=Rab7a PE=1 SV=2 - [RAB7A_MOUSE]	135.559	68.12	0.749329	0.777312
Q9D1D4	Transmembrane emp24 domain-containing protein 10 OS=Mus musculus GN=Tmed10 PE=2 SV=1 - [TMEDA_MOUSE]	60.6813	33.79	0.749263	0.777243
Q9JKD3	Secretory carrier-associated membrane protein 5 OS=Mus musculus GN=Scamp5 PE=2 SV=1 - [SCAM5_MOUSE]	3.80228	4.68	0.749051	0.777024
Q9CR89-2	Isoform 2 of Endoplasmic reticulum-Golgi intermediate compartment protein 2 OS=Mus musculus GN=Ergic2 - [ERGI2_MOUSE]	3.69153	4.3	0.748777	0.77674
E9PXB9	Mitochondrial import inner membrane translocase subunit Tim22 OS=Mus musculus GN=Timm22 PE=4 SV=1 - [E9PXB9_MOUSE]	2.86674	16.67	0.748559	0.776513
E9Q3K1	Protein Nfxl1 (Fragment) OS=Mus musculus GN=Nfxl1 PE=4 SV=1 - [E9Q3K1_MOUSE]	5.6712	4.62	0.748447	0.776397
E9Q9B7	Protein Kidins220 OS=Mus musculus GN=Kidins220 PE=1 SV=1 - [E9Q9B7_MOUSE]	28.3929	5.58	0.7481	0.776037
Q61735	Leukocyte surface antigen CD47 OS=Mus musculus GN=Cd47 PE=1 SV=2 - [CD47_MOUSE]	15.3981	8.91	0.747683	0.775605
Q60931	Voltage-dependent anion-selective channel protein 3 OS=Mus musculus GN=Vdac3 PE=1 SV=1 - [VDAC3_MOUSE]	41.6148	20.85	0.747647	0.775567
P41245	Matrix metalloproteinase-9 OS=Mus musculus GN=Mmp9 PE=2 SV=2 - [MMP9_MOUSE]	47.4576	16.71	0.746886	0.774778
Q8BH59	Calcium-binding mitochondrial carrier protein Aralar1 OS=Mus musculus GN=Slc25a12 PE=1 SV=1 - [CMC1_MOUSE]	100.424	34.86	0.745706	0.773554
Q9DB25	Dolichyl-phosphate beta-glucosyltransferase OS=Mus musculus GN=Alg5 PE=2 SV=1 - [ALG5_MOUSE]	17.5756	14.81	0.745207	0.773036
Q99JI6	Ras-related protein Rap-1b OS=Mus musculus GN=Rap1b PE=2 SV=2 - [RAP1B_MOUSE]	77.5262	63.04	0.745035	0.772858
Q8VCH8	UBX domain-containing protein 4 OS=Mus musculus GN=Ubxn4 PE=1 SV=1 - [UBXN4_MOUSE]	13.0426	9.49	0.744876	0.772693
O09005	Sphingolipid delta(4)-desaturase DES1 OS=Mus musculus GN=Degs1 PE=2 SV=1 - [DEGS1_MOUSE]	4.00795	5.26	0.744612	0.772419
E0CY65	Pituitary tumor-transforming gene 1 protein-interacting protein OS=Mus musculus GN=Pttg1ip PE=1 SV=1 - [E0CY65_MOUSE]	2.59581	6.67	0.744165	0.771955
P97449	Aminopeptidase N OS=Mus musculus GN=Anpep PE=1 SV=4 - [AMPN_MOUSE]	207.394	37.06	0.743211	0.770965
Q3U2C5	E3 ubiquitin-protein ligase RNF149 OS=Mus musculus GN=Rnf149 PE=1 SV=3 - [RN149_MOUSE]	3.01261	3.3	0.743183	0.770936
D3Z6S1	Transmembrane protein 214 OS=Mus musculus GN=Tmem214 PE=4 SV=1 - [D3Z6S1_MOUSE]	9.29929	4.05	0.743165	0.770918
Q8BUY5	Complex I assembly factor TIMMDC1, mitochondrial OS=Mus musculus GN=Timmdc1 PE=2 SV=1 - [TIDC1_MOUSE]	8.05443	12.98	0.742838	0.770579
Q69ZN6-2	Isoform 2 of N-acetylglucosamine-1-phosphotransferase subunits alpha/beta OS=Mus musculus GN=Gnptab - [GNPTA_MOUSE]	3.22424	0.84	0.741326	0.76901
P31996-2	Isoform Short of Macrosialin OS=Mus musculus GN=Cd68 - [CD68_MOUSE]	8.75787	5.97	0.740689	0.76835
O89109	Intermediate conductance calcium-activated potassium channel protein 4 OS=Mus musculus GN=Kcnn4 PE=2 SV=1 - [KCNN4_MOUSE]	11.5517	10.12	0.740141	0.767781
O88736	3-keto-steroid reductase OS=Mus musculus GN=Hsd17b7 PE=2 SV=1 - [DHB7_MOUSE]	24.4597	13.77	0.738228	0.765797
Q99MR3	Solute carrier family 12 member 9 OS=Mus musculus GN=Slc12a9 PE=1 SV=2 - [S12A9_MOUSE]	17.3094	8.86	0.737725	0.765275
Q9R013	Cathepsin F OS=Mus musculus GN=Ctsf PE=2 SV=1 - [CATF_MOUSE]	7.50209	5.19	0.737494	0.765035
Q80SY3	V-type proton ATPase subunit d 2 OS=Mus musculus GN=Atp6v0d2 PE=2 SV=2 - [VA0D2_MOUSE]	122.704	43.71	0.737376	0.764913
Q8R2Y8	Peptidyl-tRNA hydrolase 2, mitochondrial OS=Mus musculus GN=Ptrh2 PE=2 SV=1 - [PTH2_MOUSE]	28.9153	29.83	0.737031	0.764555
Q64253	Lymphocyte antigen 6E OS=Mus musculus GN=Ly6e PE=2 SV=2 - [LY6E_MOUSE]	4.65334	10.77	0.736711	0.764223
Q9WV55	Vesicle-associated membrane protein-associated protein A OS=Mus musculus GN=Vapa PE=1 SV=2 - [VAPA_MOUSE]	61.0383	34.94	0.733597	0.760993
Q9D6K8	FUN14 domain-containing protein 2 OS=Mus musculus GN=Fundc2 PE=2 SV=1 - [FUND2_MOUSE]	23.2883	22.52	0.733287	0.760671
Q9DB73	NADH-cytochrome b5 reductase 1 OS=Mus musculus GN=Cyb5r1 PE=2 SV=1 - [NB5R1_MOUSE]	48.3129	27.87	0.731739	0.759066
Q91YQ5	Dolichyl-diphosphooligosaccharide--protein glycosyltransferase subunit 1 OS=Mus musculus GN=Rpn1 PE=1 SV=1 - [RPN1_MOUSE]	91.8905	27.47	0.730541	0.757823
G5E829	MCG13663, isoform CRA_a OS=Mus musculus GN=Atp2b1 PE=1 SV=1 - [G5E829_MOUSE]	63.7501	14.75	0.730178	0.757446
S4R1M0	Receptor-type tyrosine-protein phosphatase C OS=Mus musculus GN=Ptprc PE=1 SV=1 - [S4R1M0_MOUSE]	105.829	24.25	0.73012	0.757386
Q9CQZ6	NADH dehydrogenase [ubiquinone] 1 beta subcomplex subunit 3 OS=Mus musculus GN=Ndufb3 PE=1 SV=1 - [NDUB3_MOUSE]	6.74508	26.92	0.729984	0.757245
D3Z5Y5	Choline/ethanolaminephosphotransferase 1 (Fragment) OS=Mus musculus GN=Cept1 PE=4 SV=1 - [D3Z5Y5_MOUSE]	3.36174	18.33	0.729942	0.757201
E9PYT3	Atlastin-3 OS=Mus musculus GN=Atl3 PE=4 SV=1 - [E9PYT3_MOUSE]	31.7797	11.19	0.729638	0.756885
Q5SS00	DBF4-type zinc finger-containing protein 2 homolog OS=Mus musculus GN=Zdbf2 PE=2 SV=1 - [ZDBF2_MOUSE]	2.56782	0.68	0.728608	0.755818
Q9Z2G6	Protein sel-1 homolog 1 OS=Mus musculus GN=Sel1l PE=2 SV=2 - [SE1L1_MOUSE]	9.9688	5.32	0.728245	0.755441
P35283	Ras-related protein Rab-12 OS=Mus musculus GN=Rab12 PE=1 SV=3 - [RAB12_MOUSE]	13.5127	9.05	0.727884	0.755066
Q5SUC9	Protein SCO1 homolog, mitochondrial OS=Mus musculus GN=Sco1 PE=2 SV=1 - [SCO1_MOUSE]	3.13852	5.63	0.725982	0.753093
Q9CQW0	ER membrane protein complex subunit 6 OS=Mus musculus GN=Emc6 PE=2 SV=1 - [EMC6_MOUSE]	4.28297	11.82	0.724892	0.751963
D3YZN4	Paraplegin OS=Mus musculus GN=Spg7 PE=1 SV=1 - [D3YZN4_MOUSE]	13.5251	6.66	0.724219	0.751265
D3YU17	Nicalin OS=Mus musculus GN=Ncln PE=3 SV=1 - [D3YU17_MOUSE]	11.1179	5.87	0.723789	0.750819
Q9DBH5	Vesicular integral-membrane protein VIP36 OS=Mus musculus GN=Lman2 PE=2 SV=2 - [LMAN2_MOUSE]	21.174	15.36	0.722866	0.749861
P43024	Cytochrome c oxidase subunit 6A1, mitochondrial OS=Mus musculus GN=Cox6a1 PE=1 SV=2 - [CX6A1_MOUSE]	18.2789	26.13	0.721887	0.748846
Q8BMD8	Calcium-binding mitochondrial carrier protein SCaMC-1 OS=Mus musculus GN=Slc25a24 PE=1 SV=1 - [SCMC1_MOUSE]	34.9129	17.05	0.72138	0.74832
Q0VGU5	Vitamin K epoxide reductase complex subunit 1-like protein 1 OS=Mus musculus GN=Vkorc1l1 PE=2 SV=1 - [Q0VGU5_MOUSE]	2.85561	7.87	0.721292	0.748229
Q8BYI6	Lysophosphatidylcholine acyltransferase 2 OS=Mus musculus GN=Lpcat2 PE=1 SV=1 - [PCAT2_MOUSE]	4.65426	4.23	0.721178	0.74811
Q9CQC7	NADH dehydrogenase [ubiquinone] 1 beta subcomplex subunit 4 OS=Mus musculus GN=Ndufb4 PE=1 SV=3 - [NDUB4_MOUSE]	22.9041	28.68	0.71898	0.74583
Q505D7	Optic atrophy 3 protein homolog OS=Mus musculus GN=Opa3 PE=1 SV=1 - [OPA3_MOUSE]	4.05278	6.7	0.718388	0.745216
B1ARC5	Zinc transporter ZIP11 (Fragment) OS=Mus musculus GN=Slc39a11 PE=4 SV=2 - [B1ARC5_MOUSE]	4.77478	12.75	0.717667	0.744467
Q9CXR1	Dehydrogenase/reductase SDR family member 7 OS=Mus musculus GN=Dhrs7 PE=2 SV=2 - [DHRS7_MOUSE]	8.57587	8.28	0.717531	0.744327
P36371	Antigen peptide transporter 2 OS=Mus musculus GN=Tap2 PE=2 SV=1 - [TAP2_MOUSE]	17.7556	7.98	0.717519	0.744314
Q61334	B-cell receptor-associated protein 29 OS=Mus musculus GN=Bcap29 PE=1 SV=1 - [BAP29_MOUSE]	10.4632	9.58	0.716608	0.74337
P61620	Protein transport protein Sec61 subunit alpha isoform 1 OS=Mus musculus GN=Sec61a1 PE=2 SV=2 - [S61A1_MOUSE]	21.346	8.61	0.716287	0.743036
Q78T54-2	Isoform 2 of Vacuolar ATPase assembly integral membrane protein Vma21 OS=Mus musculus GN=Vma21 - [VMA21_MOUSE]	7.6648	14.46	0.715608	0.742331
Q9D024	Coiled-coil domain-containing protein 47 OS=Mus musculus GN=Ccdc47 PE=2 SV=2 - [CCD47_MOUSE]	44.3172	19.67	0.714621	0.741308
P35821	Tyrosine-protein phosphatase non-receptor type 1 OS=Mus musculus GN=Ptpn1 PE=1 SV=2 - [PTN1_MOUSE]	21.0891	12.96	0.714363	0.74104
Q9DC16	Endoplasmic reticulum-Golgi intermediate compartment protein 1 OS=Mus musculus GN=Ergic1 PE=1 SV=1 - [ERGI1_MOUSE]	15.9224	14.48	0.714098	0.740765
Q9WU81	Sugar phosphate exchanger 2 OS=Mus musculus GN=Slc37a2 PE=1 SV=1 - [SPX2_MOUSE]	13.7589	9.98	0.711729	0.738309
O70252	Heme oxygenase 2 OS=Mus musculus GN=Hmox2 PE=2 SV=1 - [HMOX2_MOUSE]	53.8249	33.02	0.71166	0.738236
Q99KF1	Transmembrane emp24 domain-containing protein 9 OS=Mus musculus GN=Tmed9 PE=1 SV=2 - [TMED9_MOUSE]	18.4392	14.47	0.711483	0.738053
Q9CQ69	Cytochrome b-c1 complex subunit 8 OS=Mus musculus GN=Uqcrq PE=1 SV=3 - [QCR8_MOUSE]	18.0169	39.02	0.710205	0.736727
Q9CRA4	Methylsterol monooxygenase 1 OS=Mus musculus GN=Msmo1 PE=2 SV=1 - [MSMO1_MOUSE]	8.69141	4.78	0.710109	0.736628
F6WEH1	DnaJ homolog subfamily C member 1 (Fragment) OS=Mus musculus GN=Dnajc1 PE=4 SV=1 - [F6WEH1_MOUSE]	5.92845	32.76	0.70895	0.735425
P35290	Ras-related protein Rab-24 OS=Mus musculus GN=Rab24 PE=1 SV=2 - [RAB24_MOUSE]	3.48857	4.43	0.706661	0.733051
O08600	Endonuclease G, mitochondrial OS=Mus musculus GN=Endog PE=2 SV=1 - [NUCG_MOUSE]	5.03436	9.18	0.706332	0.73271
Q9ESU7	Neutral amino acid transporter ASCT2 OS=Mus musculus GN=Slc1a5 PE=1 SV=1 - [Q9ESU7_MOUSE]	29.2581	11.35	0.705821	0.732179
Q922Q8	Leucine-rich repeat-containing protein 59 OS=Mus musculus GN=Lrrc59 PE=1 SV=1 - [LRC59_MOUSE]	60.2271	37.79	0.705324	0.731663
Q64704-4	Isoform 3D of Syntaxin-3 OS=Mus musculus GN=Stx3 - [STX3_MOUSE]	3.12736	13.95	0.704532	0.730842
B1ATS4	Sarcoplasmic/endoplasmic reticulum calcium ATPase 3 OS=Mus musculus GN=Atp2a3 PE=3 SV=1 - [B1ATS4_MOUSE]	45.0858	10.91	0.704033	0.730325
Q9ERS2	NADH dehydrogenase [ubiquinone] 1 alpha subcomplex subunit 13 OS=Mus musculus GN=Ndufa13 PE=1 SV=3 - [NDUAD_MOUSE]	6.52872	18.75	0.700299	0.726452
F7BHM8	Monoacylglycerol lipase ABHD12 (Fragment) OS=Mus musculus GN=Abhd12 PE=4 SV=1 - [F7BHM8_MOUSE]	4.41377	37.5	0.700212	0.726361
Q9CY50	Translocon-associated protein subunit alpha OS=Mus musculus GN=Ssr1 PE=1 SV=1 - [SSRA_MOUSE]	10.8982	9.09	0.699549	0.725673
Q80W54	CAAX prenyl protease 1 homolog OS=Mus musculus GN=Zmpste24 PE=1 SV=2 - [FACE1_MOUSE]	14.7586	5.05	0.699231	0.725344
Q9QXX4	Calcium-binding mitochondrial carrier protein Aralar2 OS=Mus musculus GN=Slc25a13 PE=1 SV=1 - [CMC2_MOUSE]	84.4491	28.7	0.699121	0.725229
Q9JHF5	A3 subunit of vacuolar-adenosine triphosphatase OS=Mus musculus GN=Tcirg1 PE=1 SV=1 - [Q9JHF5_MOUSE]	130.592	26.26	0.698285	0.724362
P48771	Cytochrome c oxidase subunit 7A2, mitochondrial OS=Mus musculus GN=Cox7a2 PE=1 SV=2 - [CX7A2_MOUSE]	24.9174	15.66	0.698189	0.724263
O35604	Niemann-Pick C1 protein OS=Mus musculus GN=Npc1 PE=1 SV=2 - [NPC1_MOUSE]	5.669	1.33	0.69788	0.723941
P63213	Guanine nucleotide-binding protein G(I)/G(S)/G(O) subunit gamma-2 OS=Mus musculus GN=Gng2 PE=2 SV=2 - [GBG2_MOUSE]	11.4781	29.58	0.696523	0.722534
Q9WTR1	Transient receptor potential cation channel subfamily V member 2 OS=Mus musculus GN=Trpv2 PE=1 SV=2 - [TRPV2_MOUSE]	56.6619	14.02	0.694891	0.720841
P46978	Dolichyl-diphosphooligosaccharide--protein glycosyltransferase subunit STT3A OS=Mus musculus GN=Stt3a PE=1 SV=1 - [STT3A_MOUSE]	14.9208	5.39	0.694293	0.720221
Q61029-3	Isoform Epsilon of Lamina-associated polypeptide 2, isoforms beta/delta/epsilon/gamma OS=Mus musculus GN=Tmpo - [LAP2B_MOUSE]	91.1259	27.18	0.694205	0.720129
Q3UN02	Lysocardiolipin acyltransferase 1 OS=Mus musculus GN=Lclat1 PE=2 SV=2 - [LCLT1_MOUSE]	3.43235	2.39	0.693745	0.719653
Q9CR62	Mitochondrial 2-oxoglutarate/malate carrier protein OS=Mus musculus GN=Slc25a11 PE=1 SV=3 - [M2OM_MOUSE]	58.3261	33.44	0.693521	0.71942
P12787	Cytochrome c oxidase subunit 5A, mitochondrial OS=Mus musculus GN=Cox5a PE=1 SV=2 - [COX5A_MOUSE]	48.7068	34.25	0.690122	0.715894
Q8BGU5-2	Isoform 2 of Cyclin-Y OS=Mus musculus GN=Ccny - [CCNY_MOUSE]	4.18321	5.38	0.689266	0.715006
O08579	Emerin OS=Mus musculus GN=Emd PE=1 SV=1 - [EMD_MOUSE]	18.0289	22.78	0.687484	0.713158
Q8BWC0	Two pore calcium channel protein 2 OS=Mus musculus GN=Tpcn2 PE=1 SV=1 - [TPC2_MOUSE]	3.0231	2.19	0.687217	0.712881
Q3TYS2	Uncharacterized protein C17orf62 homolog OS=Mus musculus PE=2 SV=2 - [CQ062_MOUSE]	3.82062	4.81	0.686377	0.71201
Q9CQQ7	ATP synthase F(0) complex subunit B1, mitochondrial OS=Mus musculus GN=Atp5f1 PE=1 SV=1 - [AT5F1_MOUSE]	18.4108	19.92	0.686372	0.712005
F6RMJ1	SUN domain-containing protein 1 (Fragment) OS=Mus musculus GN=Sun1 PE=4 SV=1 - [F6RMJ1_MOUSE]	2.81462	3.88	0.686128	0.711751
Q8JZU2	Protein Slc25a1 OS=Mus musculus GN=Slc25a1 PE=2 SV=1 - [Q8JZU2_MOUSE]	9.08688	9.97	0.685784	0.711395
Q8C0Z1	Protein ITFG3 OS=Mus musculus GN=Itfg3 PE=1 SV=1 - [ITFG3_MOUSE]	3.48049	1.62	0.682218	0.707695
Q9DCN2-2	Isoform 2 of NADH-cytochrome b5 reductase 3 OS=Mus musculus GN=Cyb5r3 - [NB5R3_MOUSE]	141.822	72.76	0.681606	0.70706
Q8BLF1	Neutral cholesterol ester hydrolase 1 OS=Mus musculus GN=Nceh1 PE=1 SV=1 - [NCEH1_MOUSE]	24.3094	11.27	0.681588	0.707041
O55022	Membrane-associated progesterone receptor component 1 OS=Mus musculus GN=Pgrmc1 PE=1 SV=4 - [PGRC1_MOUSE]	20.131	20.51	0.681344	0.706789
Q3TDQ1	Dolichyl-diphosphooligosaccharide--protein glycosyltransferase subunit STT3B OS=Mus musculus GN=Stt3b PE=1 SV=2 - [STT3B_MOUSE]	7.45464	2.55	0.681023	0.706455
Q6AXE3	ATP-binding cassette sub-family A member 3 OS=Mus musculus GN=Abca3 PE=2 SV=1 - [Q6AXE3_MOUSE]	2.85161	0.48	0.681006	0.706438
Q00609-2	Isoform 2 of T-lymphocyte activation antigen CD80 OS=Mus musculus GN=Cd80 - [CD80_MOUSE]	3.79169	4.25	0.679273	0.70464
Q3TFD2-3	Isoform 3 of Lysophosphatidylcholine acyltransferase 1 OS=Mus musculus GN=Lpcat1 - [PCAT1_MOUSE]	35.6076	22.36	0.678396	0.703731
Q80WJ7	Protein LYRIC OS=Mus musculus GN=Mtdh PE=1 SV=1 - [LYRIC_MOUSE]	85.4915	30.05	0.677241	0.702532
P35564	Calnexin OS=Mus musculus GN=Canx PE=1 SV=1 - [CALX_MOUSE]	134.086	27.07	0.676621	0.701889
P49282-2	Isoform 1 of Natural resistance-associated macrophage protein 2 OS=Mus musculus GN=Slc11a2 - [NRAM2_MOUSE]	5.2677	2.32	0.676312	0.701568
Q99KI3	ER membrane protein complex subunit 3 OS=Mus musculus GN=Emc3 PE=2 SV=3 - [EMC3_MOUSE]	12.0242	8.81	0.675463	0.700688
Q8JZQ2	AFG3-like protein 2 OS=Mus musculus GN=Afg3l2 PE=1 SV=1 - [AFG32_MOUSE]	56.65	18.08	0.675425	0.700649
D3Z2J6	Thioredoxin-related transmembrane protein 2 OS=Mus musculus GN=Tmx2 PE=4 SV=1 - [D3Z2J6_MOUSE]	3.57161	3.89	0.674436	0.699623
Q9D186	Apolipoprotein O OS=Mus musculus GN=Apoo PE=2 SV=1 - [Q9D186_MOUSE]	7.0454	15.24	0.673894	0.69906
O54734	Dolichyl-diphosphooligosaccharide--protein glycosyltransferase 48 kDa subunit OS=Mus musculus GN=Ddost PE=1 SV=2 - [OST48_MOUSE]	26.654	11.34	0.671683	0.696766
Q9R1R8	Retinol dehydrogenase 11 OS=Mus musculus GN=Rdh11 PE=2 SV=1 - [Q9R1R8_MOUSE]	6.70346	8	0.671046	0.696105
P48962	ADP/ATP translocase 1 OS=Mus musculus GN=Slc25a4 PE=1 SV=4 - [ADT1_MOUSE]	80.4235	29.53	0.669741	0.694752
Q06185	ATP synthase subunit e, mitochondrial OS=Mus musculus GN=Atp5i PE=1 SV=2 - [ATP5I_MOUSE]	15.1737	66.2	0.66956	0.694564
D6RGA3	Lysophospholipid acyltransferase 5 OS=Mus musculus GN=Lpcat3 PE=4 SV=1 - [D6RGA3_MOUSE]	6.29333	7.43	0.668834	0.693812
Q9DCF9-2	Isoform 2 of Translocon-associated protein subunit gamma OS=Mus musculus GN=Ssr3 - [SSRG_MOUSE]	4.30219	7.82	0.668212	0.693166
G3X8R0	Receptor accessory protein 5, isoform CRA_a OS=Mus musculus GN=Reep5 PE=4 SV=1 - [G3X8R0_MOUSE]	32.682	16.4	0.667237	0.692154
F7BFL8	GRAM domain-containing protein 1B (Fragment) OS=Mus musculus GN=Gramd1b PE=4 SV=1 - [F7BFL8_MOUSE]	3.6919	2.25	0.666858	0.691762
Q6ZQM8	UDP-glucuronosyltransferase 1-7C OS=Mus musculus GN=Ugt1a7c PE=2 SV=1 - [UD17C_MOUSE]	27.2551	19.77	0.665269	0.690113
Q9CQ54	NADH dehydrogenase [ubiquinone] 1 subunit C2 OS=Mus musculus GN=Ndufc2 PE=1 SV=1 - [NDUC2_MOUSE]	3.87208	10.83	0.66479	0.689616
Q61335	B-cell receptor-associated protein 31 OS=Mus musculus GN=Bcap31 PE=1 SV=4 - [BAP31_MOUSE]	11.8181	8.57	0.664135	0.688936
Q8R0X7	Sphingosine-1-phosphate lyase 1 OS=Mus musculus GN=Sgpl1 PE=2 SV=1 - [SGPL1_MOUSE]	81.6283	25.88	0.664002	0.688799
Q9D1M7	Peptidyl-prolyl cis-trans isomerase FKBP11 OS=Mus musculus GN=Fkbp11 PE=2 SV=1 - [FKB11_MOUSE]	14.7506	8.96	0.663774	0.688562
F2Z3Y7	Cytochrome P450 20A1 OS=Mus musculus GN=Cyp20a1 PE=4 SV=1 - [F2Z3Y7_MOUSE]	2.86687	3.4	0.663741	0.688528
P19783	Cytochrome c oxidase subunit 4 isoform 1, mitochondrial OS=Mus musculus GN=Cox4i1 PE=1 SV=2 - [COX41_MOUSE]	12.4196	27.22	0.663311	0.688082
P03888	NADH-ubiquinone oxidoreductase chain 1 OS=Mus musculus GN=Mtnd1 PE=1 SV=3 - [NU1M_MOUSE]	5.20282	6.29	0.663272	0.688042
Q8R5J9	PRA1 family protein 3 OS=Mus musculus GN=Arl6ip5 PE=1 SV=2 - [PRAF3_MOUSE]	20.4795	16.49	0.661652	0.686361
Q8VE98	CD276 antigen OS=Mus musculus GN=Cd276 PE=1 SV=1 - [CD276_MOUSE]	3.48952	3.16	0.661062	0.685749
Q8BH80	Vesicle-associated membrane protein, associated protein B and C OS=Mus musculus GN=Vapb PE=2 SV=1 - [Q8BH80_MOUSE]	46.8253	29.22	0.661018	0.685703
Q9JKN1	Zinc transporter 7 OS=Mus musculus GN=Slc30a7 PE=1 SV=1 - [ZNT7_MOUSE]	3.94645	3.97	0.657277	0.681823
Q99J27	Acetyl-coenzyme A transporter 1 OS=Mus musculus GN=Slc33a1 PE=1 SV=1 - [ACATN_MOUSE]	7.00453	3.45	0.656286	0.680794
Q9JJF9	Signal peptide peptidase-like 2A OS=Mus musculus GN=Sppl2a PE=1 SV=2 - [SPP2A_MOUSE]	5.34323	2.68	0.656135	0.680638
O55143	Sarcoplasmic/endoplasmic reticulum calcium ATPase 2 OS=Mus musculus GN=Atp2a2 PE=1 SV=2 - [AT2A2_MOUSE]	187.504	33.62	0.655786	0.680276
Q8BN82-2	Isoform 2 of Sialin OS=Mus musculus GN=Slc17a5 - [S17A5_MOUSE]	2.98048	1.71	0.655435	0.679912
D3Z2B4	Xenotropic and polytropic retrovirus receptor 1 OS=Mus musculus GN=Xpr1 PE=1 SV=1 - [D3Z2B4_MOUSE]	3.68827	1.27	0.655378	0.679853
Q9CQB5	CDGSH iron-sulfur domain-containing protein 2 OS=Mus musculus GN=Cisd2 PE=1 SV=1 - [CISD2_MOUSE]	17.8593	21.48	0.654523	0.678965
Q9CQY5-2	Isoform 2 of Magnesium transporter protein 1 OS=Mus musculus GN=Magt1 - [MAGT1_MOUSE]	6.20162	2.61	0.65168	0.676017
P97742	Carnitine O-palmitoyltransferase 1, liver isoform OS=Mus musculus GN=Cpt1a PE=1 SV=4 - [CPT1A_MOUSE]	2.68095	1.55	0.648779	0.673007
D3YUK4	NADH dehydrogenase [ubiquinone] 1 beta subcomplex subunit 10 (Fragment) OS=Mus musculus GN=Ndufb10 PE=4 SV=1 - [D3YUK4_MOUSE]	27.744	36.24	0.647867	0.672061
E9PVP3	Mannose-P-dolichol utilization defect 1 protein OS=Mus musculus GN=Mpdu1 PE=4 SV=1 - [E9PVP3_MOUSE]	3.06828	9.17	0.647682	0.671869
Q61263	Sterol O-acyltransferase 1 OS=Mus musculus GN=Soat1 PE=2 SV=2 - [SOAT1_MOUSE]	42.0096	11.11	0.647098	0.671263
Q8VEM8	Phosphate carrier protein, mitochondrial OS=Mus musculus GN=Slc25a3 PE=1 SV=1 - [MPCP_MOUSE]	41.7101	33.05	0.646385	0.670524
D3YWT0	Signal peptidase complex catalytic subunit SEC11A OS=Mus musculus GN=Sec11a PE=4 SV=1 - [D3YWT0_MOUSE]	5.38064	11.76	0.645591	0.6697
Q9D958	Signal peptidase complex subunit 1 OS=Mus musculus GN=Spcs1 PE=2 SV=3 - [SPCS1_MOUSE]	7.53457	8.07	0.639272	0.663145
A3KGR9	Minor histocompatibility antigen H13 (Fragment) OS=Mus musculus GN=H13 PE=4 SV=1 - [A3KGR9_MOUSE]	10.9142	6.34	0.638371	0.662211
D3Z7P2	Transmembrane protein 109 (Fragment) OS=Mus musculus GN=Tmem109 PE=4 SV=1 - [D3Z7P2_MOUSE]	3.35275	12.33	0.635209	0.65893
Q91XD7	Cysteine-rich with EGF-like domain protein 1 OS=Mus musculus GN=Creld1 PE=2 SV=1 - [CREL1_MOUSE]	3.51995	3.33	0.634818	0.658525
H3BJ71	cTAGE family member 5 (Fragment) OS=Mus musculus GN=Ctage5 PE=4 SV=1 - [H3BJ71_MOUSE]	20.9447	11.87	0.633831	0.657501
Q9D023	Mitochondrial pyruvate carrier 2 OS=Mus musculus GN=Mpc2 PE=1 SV=1 - [MPC2_MOUSE]	3.96192	7.87	0.63362	0.657283
Q9Z2I0	LETM1 and EF-hand domain-containing protein 1, mitochondrial OS=Mus musculus GN=Letm1 PE=2 SV=1 - [LETM1_MOUSE]	44.514	15.31	0.629321	0.652822
Q8BN21-2	Isoform 2 of Serine/threonine-protein kinase VRK2 OS=Mus musculus GN=Vrk2 - [VRK2_MOUSE]	3.53618	2.42	0.628415	0.651883
Q9CRC0	Vitamin K epoxide reductase complex subunit 1 OS=Mus musculus GN=Vkorc1 PE=2 SV=1 - [VKOR1_MOUSE]	3.19882	8.07	0.627448	0.65088
G3X9N6	Oxysterol-binding protein OS=Mus musculus GN=Osbpl8 PE=1 SV=1 - [G3X9N6_MOUSE]	85.8977	22.67	0.625981	0.649358
Q9CR67	Transmembrane protein 33 OS=Mus musculus GN=Tmem33 PE=2 SV=1 - [TMM33_MOUSE]	4.14397	4.05	0.619503	0.642638
P03930	ATP synthase protein 8 OS=Mus musculus GN=Mtatp8 PE=1 SV=1 - [ATP8_MOUSE]	2.98003	11.94	0.618631	0.641734
Q9CZX7	Type 2 phosphatidylinositol 4,5-bisphosphate 4-phosphatase OS=Mus musculus GN=Tmem55a PE=1 SV=1 - [TM55A_MOUSE]	4.57205	4.28	0.616454	0.639475
P51881	ADP/ATP translocase 2 OS=Mus musculus GN=Slc25a5 PE=1 SV=3 - [ADT2_MOUSE]	108.148	32.55	0.615905	0.638905
O70503	Estradiol 17-beta-dehydrogenase 12 OS=Mus musculus GN=Hsd17b12 PE=2 SV=1 - [DHB12_MOUSE]	53.6463	31.41	0.615638	0.638629
P00405	Cytochrome c oxidase subunit 2 OS=Mus musculus GN=Mtco2 PE=1 SV=1 - [COX2_MOUSE]	24.8488	13.22	0.614992	0.637959
Q61941	NAD(P) transhydrogenase, mitochondrial OS=Mus musculus GN=Nnt PE=1 SV=2 - [NNTM_MOUSE]	14.0984	3.31	0.613642	0.636558
O09111	NADH dehydrogenase [ubiquinone] 1 beta subcomplex subunit 11, mitochondrial OS=Mus musculus GN=Ndufb11 PE=1 SV=2 - [NDUBB_MOUSE]	6.28421	7.28	0.609429	0.632188
D3Z568	NADH dehydrogenase (Ubiquinone) 1 beta subcomplex, 5, isoform CRA_e OS=Mus musculus GN=Ndufb5 PE=4 SV=1 - [D3Z568_MOUSE]	15.1175	33.61	0.60295	0.625467
D3Z4M2	Ceramide synthase 2 (Fragment) OS=Mus musculus GN=Cers2 PE=3 SV=1 - [D3Z4M2_MOUSE]	16.8032	16.15	0.600982	0.623426
Q9D6J5	NADH dehydrogenase [ubiquinone] 1 beta subcomplex subunit 8, mitochondrial OS=Mus musculus GN=Ndufb8 PE=1 SV=1 - [NDUB8_MOUSE]	3.14806	5.91	0.599502	0.62189
Q9CPQ8	ATP synthase subunit g, mitochondrial OS=Mus musculus GN=Atp5l PE=1 SV=1 - [ATP5L_MOUSE]	41.1833	33.98	0.599033	0.621404
G3X9L6	MCG55033 OS=Mus musculus GN=Gm10250 PE=4 SV=1 - [G3X9L6_MOUSE]	70.0586	78.75	0.591016	0.613087
F8WHP8	ATP synthase subunit f, mitochondrial OS=Mus musculus GN=Atp5j2 PE=4 SV=1 - [F8WHP8_MOUSE]	13.34	30.26	0.58882	0.610809
Q8VBT0	Thioredoxin-related transmembrane protein 1 OS=Mus musculus GN=Tmx1 PE=1 SV=1 - [TMX1_MOUSE]	14.4555	8.63	0.58856	0.610539
Q9D0M3-2	Isoform 2 of Cytochrome c1, heme protein, mitochondrial OS=Mus musculus GN=Cyc1 - [CY1_MOUSE]	43.8725	34.96	0.5845	0.606327
H3BJH5	Ceramide synthase 5 (Fragment) OS=Mus musculus GN=Cers5 PE=3 SV=1 - [H3BJH5_MOUSE]	3.54835	12.77	0.575772	0.597274
G3UWE1	MCG11048, isoform CRA_c OS=Mus musculus GN=Tecr PE=1 SV=1 - [G3UWE1_MOUSE]	6.49091	6.83	0.570373	0.591673
Q9D8B4	NADH dehydrogenase [ubiquinone] 1 alpha subcomplex subunit 11 OS=Mus musculus GN=Ndufa11 PE=2 SV=2 - [NDUAB_MOUSE]	4.53727	16.31	0.569876	0.591157
B1AXP6-2	Isoform 2 of Mitochondrial import receptor subunit TOM5 homolog OS=Mus musculus GN=Tomm5 - [TOM5_MOUSE]	3.15369	18.6	0.56395	0.58501
P56379	6.8 kDa mitochondrial proteolipid OS=Mus musculus GN=Mp68 PE=2 SV=1 - [68MP_MOUSE]	3.54544	13.79	0.559361	0.58025
Q91XE8	Transmembrane protein 205 OS=Mus musculus GN=Tmem205 PE=2 SV=1 - [TM205_MOUSE]	3.60313	8.99	0.559196	0.580079
Q8C172	Ceramide synthase 6 OS=Mus musculus GN=Cers6 PE=1 SV=1 - [CERS6_MOUSE]	6.66776	3.13	0.541636	0.561863
P50446	Keratin, type II cytoskeletal 6A OS=Mus musculus GN=Krt6a PE=2 SV=3 - [K2C6A_MOUSE]	23.4099	8.32	0.540235	0.56041
Q9CQT9	Uncharacterized protein C20orf24 homolog OS=Mus musculus PE=2 SV=1 - [CT024_MOUSE]	5.72525	12.4	0.524293	0.543873
